# Supplementary material for: Disruption of an M. tuberculosis Membrane Protein Causes a Magnesium-dependent Cell Division Defect and Failure to Persist in Mice
Source: PubMed Central journal article supplement (PMC4450064; doi:10.1371/journal.ppat.1004645), 2015-02-06
Supplement: ppat.1004645.s008.pdf [file ppat.1004645.s008.pdf]

| <b>Rv #</b> | <b>Gene</b>  | <b>FC</b> | <b>Description</b>                                                               | <b>Process</b>         |
|-------------|--------------|-----------|----------------------------------------------------------------------------------|------------------------|
| Rv2864c*    |              | 2.6       | Penicillin-binding lipoprotein<br>Possible transpeptidase PbpD                   | Cell wall biosynthesis |
| Rv0996*     |              | 2.6       | Conserved membrane protein                                                       |                        |
| Rv3074      |              | 2.5       | Conserved hypothetical protein<br>Ortholog of HNH nuclease                       | DNA replication/repair |
| Rv1698*     | <i>mctB</i>  | 2.4       | Outer membrane channel                                                           | Transport              |
| Rv3209*     |              | 2.2       | Conserved proline & threonine rich protein<br>Ortholog of MmpS3 membrane protein |                        |
| Rv1378c     |              | 2.2       | Conserved hypothetical protein<br>Ortholog of HNH nuclease                       | DNA replication/repair |
| Rv2164c*    |              | 2.2       | Conserved proline rich membrane protein<br>Possible cell division protein FtsL   | Cell division          |
| Rv2748c*    | <i>ftsK</i>  | 2.1       | Cell division protein                                                            | Cell division          |
| Rv2894c*    | <i>xerC</i>  | 2.1       | Tyrosine integrase/recombinase                                                   | Cell division          |
| Rv3370      | <i>dnaE2</i> | 2.0       | DNA polymerase III alpha chain dnaE2                                             | DNA replication/repair |
