# Supplementary material for: Disruption of an M. tuberculosis Membrane Protein Causes a Magnesium-dependent Cell Division Defect and Failure to Persist in Mice
Source: PubMed Central journal article supplement (PMC4450064; doi:10.1371/journal.ppat.1004645), 2015-02-06
Supplement: ppat.1004645.s009.pdf [file ppat.1004645.s009.pdf]

| <b>Strain</b>   | <b>Rv #</b> | <b>Gene</b>  | <b>FC</b> | <b>Description</b>                                                | <b>Process</b>    |
|-----------------|-------------|--------------|-----------|-------------------------------------------------------------------|-------------------|
| wt              | Rv1806      | <i>PE20</i>  | 3.6       | PE family protein                                                 |                   |
| wt              | Rv0166      | <i>fadD5</i> | -2.3      | Fatty-acid-CoA ligase                                             | Metabolism        |
| <i>perM::tn</i> | Rv1806      | <i>PE20</i>  | 8.4       | PE family protein                                                 |                   |
| <i>perM::tn</i> | Rv1807      | <i>PPE31</i> | 7.8       | PPE family protein                                                |                   |
| <i>perM::tn</i> | Rv1536      | <i>ileS</i>  | 2.2       | Isoleucyl-tRNA synthetase                                         | Protein synthesis |
| <i>perM::tn</i> | Rv3810      | <i>pirG</i>  | 2.0       | Exported repetitive protein                                       | Virulence         |
| <i>perM::tn</i> | Rv1435c     |              | 2.0       | Probable conserved proline, glycine, valine-rich secreted protein |                   |
| <i>perM::tn</i> | Rv0166      | <i>fadD5</i> | -2.3      | Fatty-acid-CoA ligase                                             | Metabolism        |
