# Supplementary material for: Disruption of an M. tuberculosis Membrane Protein Causes a Magnesium-dependent Cell Division Defect and Failure to Persist in Mice
Source: PubMed Central journal article supplement (PMC4450064; doi:10.1371/journal.ppat.1004645), 2015-02-06
Supplement: ppat.1004645.s010.pdf [file ppat.1004645.s010.pdf]

| <b>Strain</b>   | <b>Nitrocefin activity<br/>(nitrocefin hydrolysed min<sup>-1</sup> mg total protein<sup>-1</sup>)</b> |
|-----------------|-------------------------------------------------------------------------------------------------------|
| H37Rv           | 1.91 ± 0.245                                                                                          |
| <i>perM::tn</i> | 1.54 ± 0.655                                                                                          |
| comp            | 2.01 ± 0.227                                                                                          |
